# Supplementary material
Source: MDPI journal article supplement (https://www.mdpi.com/2571-6255/4/4/95)
Supplement: s1 [file s1]

Archive with 2 entries (2 files):
- fire-1451691-supplementary/fire-1451691-sup.pdf
- fire-1451691-supplementary/fire-1451691-sup.xlsx
