# Supplementary material
Source: MDPI journal article supplement (https://www.mdpi.com/2571-6255/4/4/95)
Supplement: s1 [file s1 › fire-1451691-supplementary/fire-1451691-sup.xlsx]

## Sheet: Biomass broadleaves
	Quantity		Cost
Personnel
Foreman	1		83.12	€/day
Qualified workers	2		74.82	€/day
Generic worker	1		67.33	€/day
Standard Forestry Crew	1 (4)		300	€/day
Efficiency	30			m3/day
Burned surface (high and moderate-high severity)	327.039			ha
Volume (broadleaves)	124719			m3
Working day (1 forestry crew)	4157			day
Total cost		9.99928	1247100
Chainsaw	2		3.3	€/h
			32.18	€/day
Total chainsaw		1.07259	133772
Mobile-tower yarder			25	€/m3
Total cost mobile-tower yarder		25	3117975
			0.4	€/m3
Chipping and loading		0.400003	49888
Insurance		3.90964	487606
Supervision and administration activities		2.01907	251817
Interest		5.84694	729225
Management costs		5.934	740083
Unforeseen costs		0.593398	74008
Total cost			6831474
Unit cost			54.77	€/m3
Average price broadleaves chips			59.34	€/m3
Gross revenue			7400825
Net revenue			569351
Unit net revenue/m3			4.57	€/m3
Unit net revenue/ha			1740.93	€/ha

## Sheet: Biomass conifers
Personnel	Quantity		Cost
Foreman	1		83.12	€/day
Qualified workers	2		74.82	€/day
Generic worker	1		67.33	€/day
Standard Forestry Crew	1 (4)		300	€/day
Efficiency	1		40	m3/day
Burned surface (high and moderate-high severity)	852.289			ha
Volume (conifers)	311150			m3
Working day (1 forestry crew)	7778.75			days
Total cost			2.33362e+06
Chainsaw	2		3.3	€/h
			32.175	€/day
Total chainsaw			250281
Mobile-tower yarder			25	€/m3
Total cost mobile-tower yarder			7.77875e+06
			0.4
Chipping and loading	0.4		58496.2
Insurance	3.16476		984715
Supervision and administration activities	1.83286		570293
Interest	2.2229		691656
Management costs	2.256		701954
Unforeseen costs	0.2256		70195.4
Total cost chips + timber			1.344e+07
Unit cost			43.1945	€/m3
Average price conifers chips			48	€/m3
Volume chips			146240	m3
Total conifers chips			7.01954e+06
Average price conifers timber			85	€/m3
Volume timber			164909	m3
Total conifers timber			1.40173e+07
Gross revenue			2.10369e+07
Net revenue			7.59688e+06
Unit net revenue			24.4155	€/m3
Unit net revenue/ha			8913.51	€/ha

## Sheet: Habitat and erosion control
Cod.	Desciption	Quantity	Unit cost					Operation code	Unit cost	Unit cost
									(€/plant)	(€/ha)
	Density shrub species	180		plants/ha				13 002		769.5
	Densità impianto alberi	720		plants/ha				13 008	1.54	1386
1030.01	Average shrub cost and planting		10.7	€/plant	1926	€/ha		13 011 d)	0.26	234
1031.01	Average tree cost and planting		60	€/plant	43200	€/ha		13 012	1.03	927
3258	Emergency irriation		0.3	€/plant	270	€/ha		17 003 b)	1.54	1386
5227.01	Soil preparation				693	€/ha		20 003	4.1	184.5
								20 006	0.33	297
	Total				46089	€/ha		19 005	1.23	1107
								13 032	8.72	1744
									Total unit cost	8035
									Surface	368.563	ha
									Logdam	200	n/ha
									Cost	2.9614e+06
									Supervision and administration activities	88842.1
									Management costs	366029
									Total cost	3.41628e+06
									Cost/ha	9269.18

## Sheet: Carbon Stock
PINE STANDS								OAK STAND								CHESTNUT STAND
	Surface (ha)	Biomass	Carbon fraction	CARBON MARKET	SOCIAL COST				Surface (ha)	Biomass	Carbon fraction	CARBON MARKET	SOCIAL COST				Surface (ha)	Biomass	Carbon fraction	CARBON MARKET	SOCIAL COST
Biomass leaves		5.01	2.505			Mg ha-1		Biomass leaves		12.68	6.34			Mg ha-1		Biomass leaves		5.18	2.59			Mg ha-1
Biomass litter		31.83	15.915			Mg ha-1		Biomass litter		15.915	7.9575			Mg ha-1		Biomass litter		15.915	7.9575			Mg ha-1
Biomass litter + leaves		36.84	18.42			Mg ha-1		Biomass litter + leaves		28.595	14.2975			Mg ha-1		Biomass litter + leaves		21.095	10.5475			Mg ha-1
High burned surface	331.873					ha		High burned surface	17.515					ha		High burned surface	2.427					ha
Moderate-High burned surface	540.416					ha		Moderate-High burned surface	223.628					ha		Moderate-High burned surface	389.292					ha
Moderate-Low burned surface	151.415					ha		Moderate-Low burned surface	87.318					ha		Moderate-Low burned surface	187.784					ha
High burned surface								High burned surface								High burned surface
Biomass leaves		1662.68	831.342			Mg		Biomass leaves		222.09	111.045			Mg		Biomass leaves		12.5719	6.28593			Mg
Biomass litter		10563.5	5281.76			Mg		Biomass litter		278.751	139.376			Mg		Biomass litter		38.6257	19.3129			Mg
Biomass litter + leaves		12226.2	6113.1	134610	448702	Mg		Biomass litter + leaves		500.841	250.421	5514.26	18380.9	Mg		Biomass litter + leaves		51.1976	25.5988	563.685	1878.95	Mg
Moderate-High burned surface								Moderate-High burned surface								Moderate-High burned surface
Biomass leaves		2165.99	1082.99			Mg		Biomass leaves		2268.48	1134.24			Mg		Biomass leaves		1613.23	806.613			Mg
Biomass litter		17201.4	8600.72			Mg		Biomass litter		3559.04	1779.52			Mg		Biomass litter		6195.58	3097.79			Mg
Biomass litter + leaves		19367.4	9683.71	213235	710785	Mg		Biomass litter + leaves		5827.52	2913.76	64161	213870	Mg		Biomass litter + leaves		7808.81	3904.4	85975	286583	Mg
Moderate-Low burned surface								Moderate-Low burned surface								Moderate-Low burned surface
Biomass leaves		379.295	189.647			Mg		Biomass leaves		553.596	276.798			Mg		Biomass leaves		486.361	243.18			Mg
Biomass litter		3855.63	1927.82			Mg		Biomass litter		1111.73	555.866			Mg		Biomass litter		2390.87	1195.43			Mg
Biomass litter + leaves		4234.93	2117.46	46626.5	155422	Mg		Biomass litter + leaves		1665.33	832.664	18335.3	61117.6	Mg		Biomass litter + leaves		2877.23	1438.61	31678.3	105594	Mg
Carbon market	6	€/Mg CO2	Total	394472	1.31491e+06			Carbon market	6	€/Mg CO2	TOTAL	88010.6	293369			Carbon market	6	€/Mg CO2	TOTAL	118217	394056
Carbon social cost	20	€/Mg CO2						Carbon social cost	20	€/Mg CO2	TOTAL					Carbon social cost	20	€/Mg CO2	TOTAL
				0.656688								0.146513								0.196799
Total Carbon market			600700
Total Carbon social cost			2.00233e+06
Cost/ha			310.975
Cost/ha			1036.58

## Sheet: Pollination
Piennolo cherry tomatoes production
Total surface	480	ha
Average annual crop production	10000	kg/ha year
Average price (no transformation)	2.5	€/kg
Year average net revenue	25000	€/ha
Total year average net revenue	12000000
Proportion of the annual production derived from wild pollinators	0.08	%
Total loss of production	960000

## Sheet: Ecotourism
Entry (period July-September 2017)	270237	visitors
Entry (period July-September 2018)	178210	visitors
Average reduction of visits to Vesuvius Cone	92027	visitors
Entry Ticket	10	€/person
Shuttle + Parking	3.25	€/person
Average visite cost	13.25	€/person
Total estimated loss	1.21936e+06

## Sheet: Suppression costs
					Terrestrial vehicles							Aerial vehicles
Forest fire	49	Days			CAR	4X4 PICK UP	VAN	TRACK	4X4 FOREST FIRE PICK UP	FIRE ENGINE		HELICOPTER S64F	HELICOPTERS	CANADAIR
				N. operation	43	4	1	2	132	48		4	40	38
Firefighters	673	n.		Average number of personnel	150.5	14	3.5	7	330	168		-	-	-
Firefighters team	3\4	people/team		Personnel cost (total)	13966.4	1299.2	324.8	649.6	30624	15590.4		-	-	-
Firefighter Unit cost	14.5	€/hour		Personnel cost (unit)	324.8	324.8	324.8	324.8	232	324.8
Working day	6.4	hour		Terrestrial vehicles cost	8600	800	200	625	41250	30000		-	-	-
Average daily cost Firefighters team	309.333	€/day
Daily cost Firefighter	88.381	€/day		Hourly cost S64F	-	-	-	-	-	-		128000
				Hourly cost helicopters (AB412, EC135, AS350 B2-B3)	-	-	-	-	-	-			640000
Total cost firefighters	62454.4	0.0227014		Hourly cost Canadair CL415	-	-	-	-	-	-				1839200
Average hourly cost fire engine	125	€/hour
Average hourly cost heavy vehicle (> 3.5 Mg)	62.5	€/hour
Average hourly cost light vehicle (< 3.5 Mg)	40	€/hour
Hours/operation with vehicles	5	hour
Total cost terrestrial vehicles	81475	0.0296151
Unit fuel expenses S64F	2000	l/hour
Unit fuel expenses (AB412, EC135, AS350 B2-B3)	500	l/hour
Unit fuel expenses Canadair CL415	1200	l/hour
Hourly costs (fuel expenses not included)
Hourly cost S64F	3600	€/hour
Hourly cost helicopters(AB412, EC135, AS350 B2-B3)	2500	€/hour
Hourly cost Canadair CL415	8000	€/hour
Hourly costs (fuel expenses included)
Hourly cost S64F	6400	€/hour
Hourly cost helicopters (AB412, EC135, AS350 B2-B3)	3200	€/hour
Hourly cost Canadair CL415	9680	€/hour
Fuel cost	1.4	€/l
Aerial vehicles total cost	2607200	0.947684
Total suppression cost	2751129

## Sheet: Summary
Ecosystem Service	Total value loss		Economic footprint	Total value loss
Timber and chips biomass	8.16626e+06		Provisioning	8.16626e+06
Ecotourism	1.21936e+06		Maitenance and regulation	4.97695e+06
Habitat and erosion control	3.41628e+06		Cultural	1.21936e+06
Pollination	960000		Suppression cost	2751129
Carbon Stock	600677
Total	1.43626e+07		Total economic footprint	1.71137e+07
